# Supplementary material for: Genetic insight and mapping of the pod constriction trait in Virginia-type peanut
Source: PubMed Central journal article supplement (PMC6195699; doi:10.1186/s12863-018-0674-z), 2018-10-19
Supplement: 12863_2018_674_MOESM1_ESM.pdf [file 12863_2018_674_MOESM1_ESM.pdf]

**Figure S1**

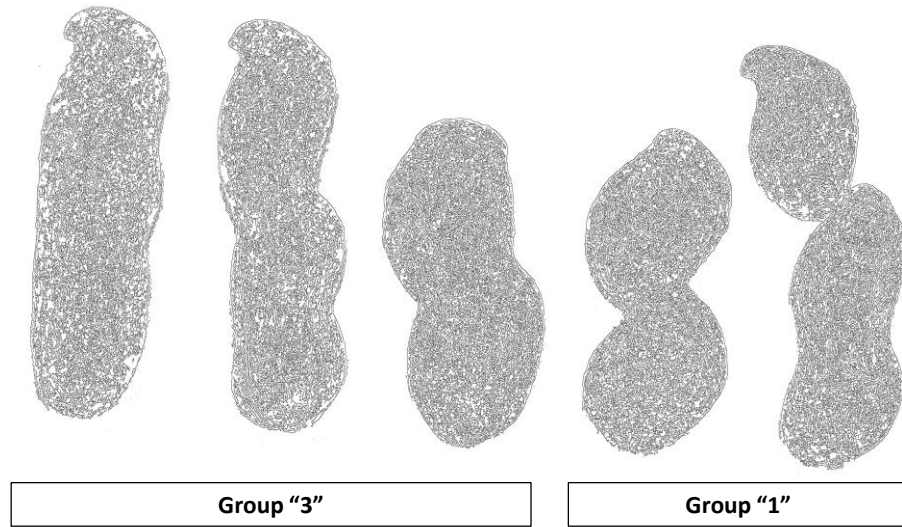

**Figure S2**

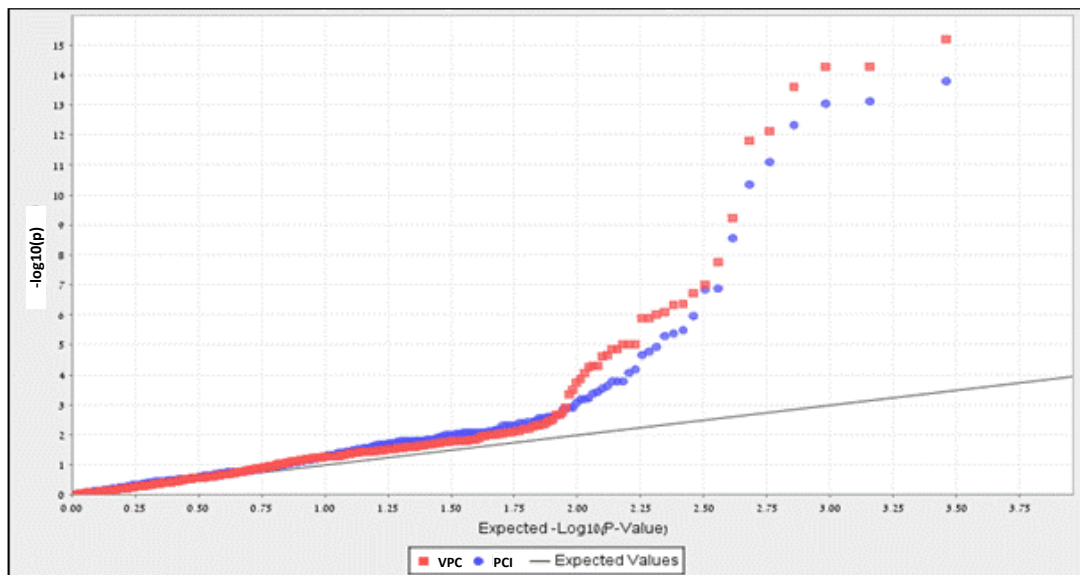

**Table S1.** Significant SNP markers associated with visual (VPC) and quantitative (PCI) assessments of the pod-constriction trait

| Trait | Probe ID    | Chromosome | Position(bp) | <i>p</i> -value | $-\log_{10}(p)$ | Marker $R^2$ |
|-------|-------------|------------|--------------|-----------------|-----------------|--------------|
| VPC   | AX177638964 | 17         | 120287958    | 6.2E-16         | 15.20           | 0.32         |
| VPC   | AX177640139 | 17         | 120268599    | 5.1E-15         | 14.29           | 0.29         |
| VPC   | AX177639436 | 17         | 120420782    | 5.3E-15         | 14.28           | 0.29         |
| VPC   | AX176822599 | 17         | 120699791    | 2.4E-14         | 13.61           | 0.28         |
| VPC   | AX177639347 | 17         | 120550537    | 7.6E-13         | 12.12           | 0.24         |
| VPC   | AX176808161 | 17         | 120838334    | 1.6E-12         | 11.81           | 0.26         |
| VPC   | AX176821561 | 17         | 121098593    | 5.9E-10         | 9.23            | 0.21         |
| VPC   | AX176815698 | 17         | 122055610    | 1.8E-08         | 7.76            | 0.18         |
| VPC   | AX176822637 | 17         | 122247802    | 9.6E-08         | 7.02            | 0.15         |
| VPC   | AX147256630 | 17         | 121954137    | 1.9E-07         | 6.72            | 0.15         |
| VPC   | AX147256649 | 17         | 122177705    | 4.3E-07         | 6.36            | 0.14         |
| VPC   | AX176817885 | 17         | 122260525    | 4.6E-07         | 6.34            | 0.14         |
| VPC   | AX177637980 | 17         | 122128386    | 8.0E-07         | 6.10            | 0.13         |
| VPC   | AX176806530 | 17         | 30845972     | 9.4E-07         | 6.03            | 0.12         |
| VPC   | AX176809651 | 17         | 114704092    | 1.3E-06         | 5.90            | 0.13         |
| VPC   | AX176817995 | 17         | 16412296     | 1.3E-06         | 5.89            | 0.13         |
| VPC   | AX176792556 | 8          | 1053912      | 9.7E-06         | 5.01            | 0.11         |
| VPC   | AX147256000 | 17         | 102224525    | 9.7E-06         | 5.01            | 0.11         |
| VPC   | AX176819626 | 17         | 106063047    | 9.7E-06         | 5.01            | 0.11         |
| VPC   | AX176803520 | 17         | 122476073    | 1.4E-05         | 4.86            | 0.11         |
| VPC   | AX177638909 | 17         | 111731434    | 1.4E-05         | 4.85            | 0.11         |
| PCI   | AX177638964 | 17         | 120287958    | 1.6E-14         | 13.79           | 0.30         |
| PCI   | AX177640139 | 17         | 120268599    | 7.5E-14         | 13.12           | 0.27         |
| PCI   | AX177639436 | 17         | 120420782    | 8.8E-14         | 13.05           | 0.27         |
| PCI   | AX176822599 | 17         | 120699791    | 4.6E-13         | 12.34           | 0.26         |
| PCI   | AX177639347 | 17         | 120550537    | 8.0E-12         | 11.10           | 0.22         |
| PCI   | AX176808161 | 17         | 120838334    | 4.4E-11         | 10.36           | 0.24         |
| PCI   | AX176821561 | 17         | 121098593    | 2.7E-09         | 8.57            | 0.20         |
| PCI   | AX176815698 | 17         | 122055610    | 1.3E-07         | 6.87            | 0.16         |
| PCI   | AX176822637 | 17         | 122247802    | 1.4E-07         | 6.86            | 0.15         |
| PCI   | AX147256630 | 17         | 121954137    | 1.1E-06         | 5.95            | 0.13         |
| PCI   | AX147256649 | 17         | 122177705    | 3.3E-06         | 5.49            | 0.12         |
| PCI   | AX177637980 | 17         | 122128386    | 4.1E-06         | 5.39            | 0.12         |
| PCI   | AX176817885 | 17         | 122260525    | 5.0E-06         | 5.30            | 0.12         |
| PCI   | AX176806530 | 17         | 30845972     | 1.2E-05         | 4.93            | 0.10         |
| PCI   | AX176809651 | 17         | 114704092    | 1.7E-05         | 4.78            | 0.11         |

**Table S3.** List of gene models within the B07:120287958...120699791 genomic segment.

| Genome location                       | Gene model                                                             |
|---------------------------------------|------------------------------------------------------------------------|
| Araip.B07:120285940..120287411        | Predicted methyltransferase                                            |
| Araip.B07:120364965..120365903        | Uncharacterized protein LOC102665249 isoform X4                        |
| Araip.B07:120373162..120374726        | Tetratricopeptide repeat (TPR)-like superfamily protein                |
| Araip.B07:120394118..120406510        | Myosin heavy-chain-related protein                                     |
| Araip.B07:120408286..120409428        | Galactose oxidase/kelch repeat superfamily protein;                    |
| Araip.B07:120465390..120466687        | Heavy metal transport/detoxification superfamily                       |
| <b>Araip.B07:120468417..120472189</b> | <b>MADS-box transcription factor 1</b>                                 |
| Araip.B07:120475403..120478130        | Poly [ADP-ribose] polymerase 3                                         |
| Araip.B07:120512267..120514427        | Serine/threonine-protein phosphatase 7 long-form homolog               |
| Araip.B07:120517039..120518963        | Uncharacterized protein LOC100797259 isoform X4                        |
| Araip.B07:120537272..120546148        | Uncharacterized protein LOC102661750 isoform X2 [ <i>Glycine max</i> ] |
| Araip.B07:120552289..120559291        | Sulfate transporter 1; 3;                                              |
| Araip.B07:120590131..120594404        | Sulfate transporter 1; 3                                               |
| Araip.B07:120595882..120599920        | tRNA modification GTPase, putative                                     |
| Araip.B07:120600484..120613531        | Acetyl-CoA carboxylase 1                                               |
